# Supplementary material
Source: publisher site journal article supplement (https://www.spandidos-publications.com/1582/downloadSupplementary)

Figure S1. Heatmap of 67 differentially expressed hypoxia-related genes. Red represents an upregulated gene, and green represents a downregulated gene. N, adjacent normal samples; T, breast cancer samples.

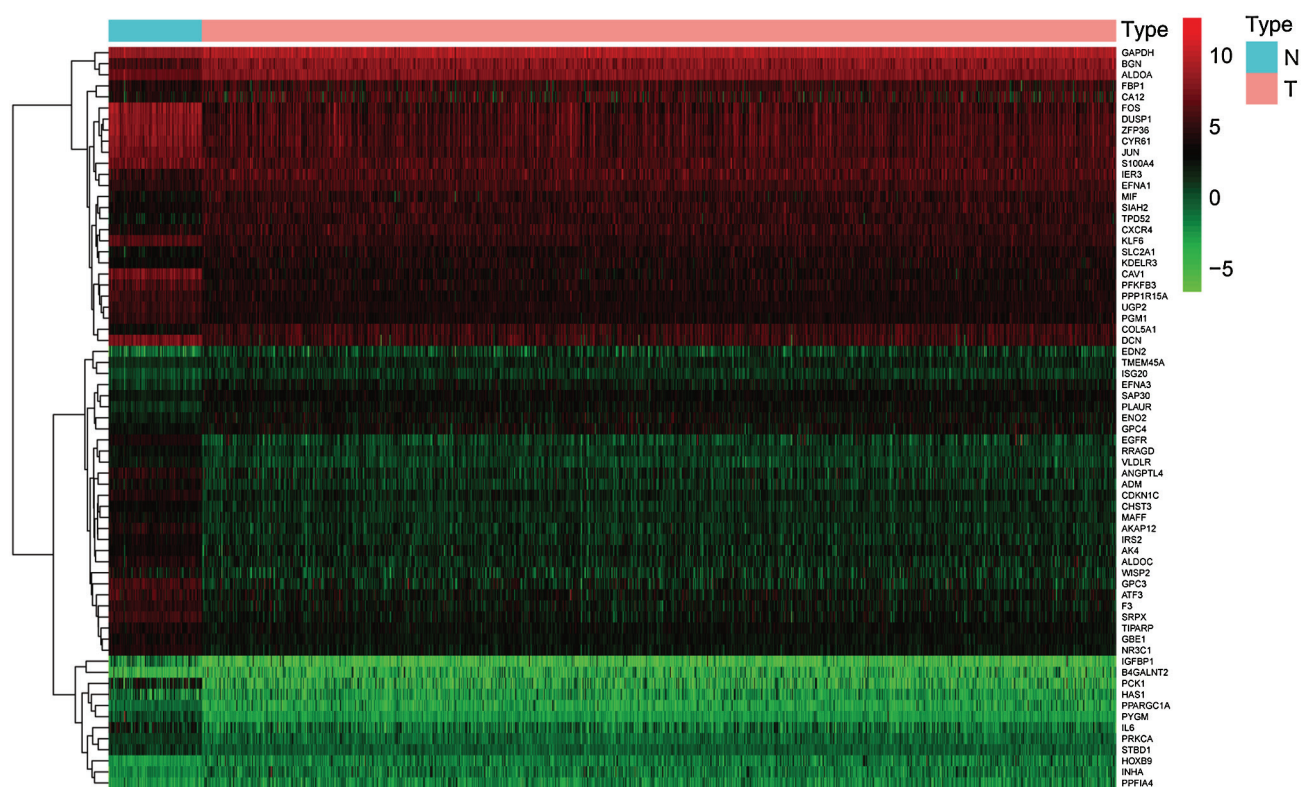

Figure S2. Volcano plot of 67 differentially expressed hypoxia-related genes. All differentially expressed hypoxia-related genes are marked as dots. A red dot represents an upregulated gene, and a green dot represents a downregulated gene. FC, fold-change; FDR, false discovery rate.

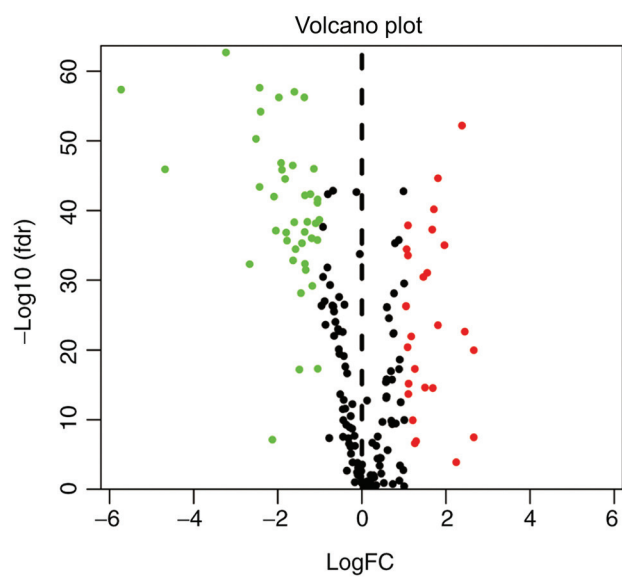

Figure S3. Association between prognostic risk signature and clinical symptoms. The association between prognostic risk signature and (A) sex, (B) T stage and (C) M stage. T, tumor; M, metastasis.

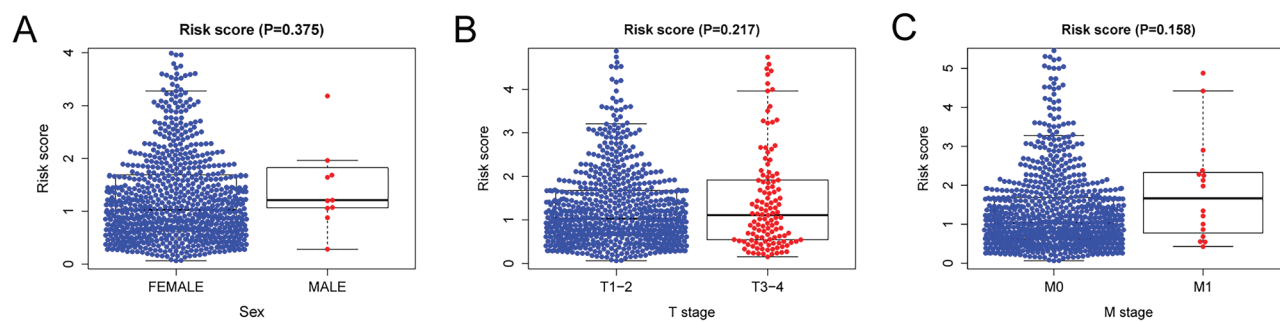

Supplement: Supplementary file 1 [file downloadSupplementary]
